# Supplementary material for: Red Yeast Rice for the Improvement of Lipid Profiles in Mild-to-Moderate Hypercholesterolemia: A Narrative Review
Source: MDPI journal article supplement (doi:10.3390/nu15102288), 2023-05-12
Supplement: s1 [file s1]

## Supplementary Materials:

**Supplemental Table S1.** Other components of monacolin K formulation in key randomized controlled trials of RYR versus placebo or statins in subjects with dyslipidemia.

| Study                               | Other Components                                                                                                                                                                                                                                                                                              |
|-------------------------------------|---------------------------------------------------------------------------------------------------------------------------------------------------------------------------------------------------------------------------------------------------------------------------------------------------------------|
| <b>Placebo comparator</b>           |                                                                                                                                                                                                                                                                                                               |
| Heber, 1999 [44]                    | Rice starch, fiber, protein, moisture, natural pigment, ash, organic phosphorus, trace elements, dihydromonacolin, monacolin I, monacolin II (hydroxy-acid form), monacolin III, monacolin IV, monacolin V, monacolin VI, saturated (palmitic and stearic) fatty acids, mono- and polyunsaturated fatty acids |
| Zhao, 2003 [45] and Zhao, 2004 [46] | Eight other monacolins, unsaturated fatty acids, sterols, isoflavones, glycerides, trace elements, other substances                                                                                                                                                                                           |
| Lin, 2005 [47]                      | Protein, starch, fat (linoleic acid, oleic acid, palmitic acid, stearic acid, ergosterol), fiber, water, other statins, gamma-aminobutyric acid, alkaloids, glycosides, flavonoids, natural pigments, ethanol extracts, water extracts, citrinin, trace elements                                              |
| Becker, 2009 [48]                   | Monacolin JA, monacolin J, monacolin XA, monacolin KA, monacolin LA, monacolin L, monacolin M, dihydromonacolin K, citrinin                                                                                                                                                                                   |
| Bogsrud, 2010 [49]                  | Other monacolins                                                                                                                                                                                                                                                                                              |
| Cicero, 2013 [50]                   | Highly purified, without detectable dehydromonacolins, decalin derivatives, contaminants                                                                                                                                                                                                                      |
| Verhoeven, 2013 [51]                | Ubiquinone (co-enzyme Q-10), procyanidins, lecithin                                                                                                                                                                                                                                                           |
| Moriarty, 2014 [52]                 | Other monacolins, phytosterols                                                                                                                                                                                                                                                                                |
| Heinz, 2016 [53]                    | Coenzyme Q10, astaxanthin, folic acid                                                                                                                                                                                                                                                                         |
| Wang, 2019 [54]                     | Other monacolins, gamma-aminobutyric acid, pigments, dimerumic acid, citrinin                                                                                                                                                                                                                                 |
| Minamizuka, 2021 [55]               | Other monacolins, pigments, organic acids (including gamma-aminobutyric acid), amino acids                                                                                                                                                                                                                    |
| <b>Statin comparator</b>            |                                                                                                                                                                                                                                                                                                               |
| Halbert, 2010 [63]                  | Other monacolins, citrinin, trace metals                                                                                                                                                                                                                                                                      |
| Ruscica, 2014 [59]                  | Berberine, policosanol, astaxanthin, coenzyme Q10, folic acid                                                                                                                                                                                                                                                 |
| Marazzi, 2017 [60]                  | Berberine, policosanol, astaxanthin, coenzyme Q10, folic acid                                                                                                                                                                                                                                                 |
| Cui, 2015 [58]                      | Other monacolins, unsaturated fatty acids, sterols, alkaloids, essential amino acids, flavonoids, trace metals                                                                                                                                                                                                |

RYR = red yeast rice.

**Supplemental Table S2.** Summary of serum lipid outcomes in key randomized controlled trials of RYR versus placebo or statins in subjects with dyslipidemia.

| Study                               | LDL-C (mmol/L)                                                                                               | TC (mmol/L)                                                                                 | HDL-C (mmol/L)                                                                              | TG (mmol/L)                                                                                 | ApoA-1 (mg/L)                                                                     | ApoB (mg/L)                                                                   |
|-------------------------------------|--------------------------------------------------------------------------------------------------------------|---------------------------------------------------------------------------------------------|---------------------------------------------------------------------------------------------|---------------------------------------------------------------------------------------------|-----------------------------------------------------------------------------------|-------------------------------------------------------------------------------|
| <b>Placebo comparator</b>           |                                                                                                              |                                                                                             |                                                                                             |                                                                                             |                                                                                   |                                                                               |
| Heber, 1999 [44]                    | CFB:<br>RYR −1.01;<br>PBO −0.13<br>$p < 0.001$ vs. PBO                                                       | CFB:<br>RYR −1.03;<br>PBO −0.13<br>$p < 0.05$ vs. PBO                                       | RYR BL 1.29, Wk 12 1.29<br>PBO BL 1.19, Wk 12 1.19<br>$p = \text{NS}$ vs. PBO               | CFB:<br>RYR −0.10;<br>PBO +0.03<br>$p = 0.05$ vs. PBO                                       | NR                                                                                | NR                                                                            |
| Zhao, 2003 [45];<br>Zhao, 2004 [46] | XZK BL 3.32, Wk 6<br>2.38; %CFB −34% $p < 0.001$<br>vs. BL<br>PBO BL 3.35, Wk 6 3.26; $p = \text{NS}$ vs. BL | XZK BL 5.37, Wk 6<br>4.36; %CFB −20% $p < 0.001$<br>PBO BL 5.37, Wk 6 5.30; $p = \text{NS}$ | XZK BL 1.15, Wk 6<br>1.35; %CFB +18% $p < 0.001$<br>PBO BL 1.15, Wk 6 1.15; $p = \text{NS}$ | XZK BL 1.77, Wk 6<br>1.22; %CFB −32% $p < 0.001$<br>PBO BL 1.74, Wk 6 1.68; $p = \text{NS}$ | %CFB +13%; $p < 0.001$                                                            | %CFB −27%; $p < 0.001$                                                        |
| Lin, 2005 [47]                      | %CFB:<br>RYR −27.7%; $p < 0.001$ vs.<br>BL and PBO<br>PBO −1.5%                                              | %CFB:<br>RYR −21.5%; $p < 0.001$ vs.<br>BL and PBO<br>PBO −0.4%                             | %CFB:<br>RYR +0.9%; $p = \text{NS}$ vs. BL<br>and PBO<br>PBO +1.0%                          | %CFB:<br>RYR −15.8%; $p < 0.05$ vs.<br>BL and PBO<br>PBO +1.0%                              | %CFB:<br>RYR +3.4%; $p = \text{NS}$ vs. BL<br>and PBO<br>PBO +2.3%                | %CFB:<br>RYR −26.0%; $p < 0.001$ vs.<br>BL and PBO<br>PBO −3.9%               |
| Becker, 2009 [48]                   | %CFB:<br>RYR −21.3%;<br>PBO −8.7%<br>$p = 0.011$                                                             | %CFB:<br>RYR −14.9%;<br>PBO −5.3%<br>$p = 0.016$                                            | %CFB:<br>RYR +8.6%; PBO +7.9%<br>$p = \text{NS}$                                            | %CFB:<br>RYR −7.2%;<br>PBO −1.4%<br>$p = \text{NS}$                                         | NR                                                                                | NR                                                                            |
| Bogsrud, 2010 [49]                  | %CFB RYR vs. PBO:<br>−23.0%<br>$p < 0.001$                                                                   | %CFB RYR vs. PBO:<br>−15.5%<br>$p < 0.001$                                                  | RYR BL 1.62, Wk 16 1.71<br>PBO BL 1.35, Wk 16 1.48<br>$p = \text{NS}$ RYR vs. PBO           | RYR BL 1.01, Wk 16 0.90<br>PBO BL 1.29, Wk 16 1.51<br>$p = \text{NS}$ RYR vs. PBO           | RYR BL 1.46, Wk 16 1.61<br>PBO BL 1.35, Wk 16 1.47<br>$p = \text{NS}$ RYR vs. PBO | RYR BL 0.99, Wk 16 0.77<br>PBO BL 1.11, Wk 16 1.11<br>$p < 0.001$ RYR vs. PBO |
| Cicero, 2013 [50]                   | %CFB RYR vs. PBO:<br>−22.0%; $p < 0.01$                                                                      | %CFB RYR vs. PBO:<br>−12.5%; $p < 0.01$                                                     | %CFB RYR vs. PBO: NS                                                                        | %CFB RYR vs. PBO: NS                                                                        | NR                                                                                | NR                                                                            |
| Verhoeven, 2013 [51]                | %CFB:<br>RYR −22.2%; PBO +1.65%<br>$p < 0.001$                                                               | %CFB:<br>RYR −14.6%; PBO +1.2%<br>$p < 0.001$                                               | %CFB:<br>RYR +3.0; PBO −0.3%<br>$p = \text{NS}$                                             | %CFB:<br>RYR −13.8%; PBO +5.0%<br>$p = 0.05$                                                | NR                                                                                | NR                                                                            |
| Moriarty, 2014 [52]                 | %CFB:<br>RYR 1200 mg                                                                                         | LS mean %CFB:<br>RYR 1200 mg −17.8%; $p <$                                                  | LS mean %CFB:<br>RYR 1200 mg +4.3%; $p =$                                                   | LS mean %CFB:<br>RYR 1200 mg                                                                | LS mean %CFB:<br>RYR 1200 mg +5.8%; $p <$                                         | LS mean %CFB:<br>RYR 1200 mg −19.0%; $p <$                                    |

|                          |                                                                                                                                                                                                         |                                                                                                                                                                                                             |                                                                                                                                                                                           |                                                                                                                                                                                                 |                                                                       |                                                                       |
|--------------------------|---------------------------------------------------------------------------------------------------------------------------------------------------------------------------------------------------------|-------------------------------------------------------------------------------------------------------------------------------------------------------------------------------------------------------------|-------------------------------------------------------------------------------------------------------------------------------------------------------------------------------------------|-------------------------------------------------------------------------------------------------------------------------------------------------------------------------------------------------|-----------------------------------------------------------------------|-----------------------------------------------------------------------|
|                          | −26.4%; $p < 0.001$ vs. BL and PBO<br>RZR 2400 mg −27.0%; $p < 0.001$ vs. BL and PBO<br>PBO +0.5%, $p = \text{NS}$ vs. BL                                                                               | 0.001 vs. PBO<br>RZR 2400 mg −18.5%; $p < 0.001$ vs. PBO<br>PBO +0.4%                                                                                                                                       | NS vs. PBO<br>RZR 2400 mg +5.2%; $p = \text{NS}$ vs. PBO<br>PBO −2.2%                                                                                                                     | −8.0%; $p = \text{NS}$ vs. PBO<br>RZR 2400 mg −5.9%; $p = \text{NS}$ vs. PBO<br>PBO +12.0%                                                                                                      | 0.001 vs. PBO<br>RZR 2400 mg +3.9%, $p = \text{NS}$ vs. PBO<br>PBO 0% | 0.001 vs. PBO<br>RZR 2400 mg −21.2%; $p < 0.001$ vs. PBO<br>PBO +2.9% |
| Heinz, 2016 [53]         | %CFB:<br>RZR −14.8%; $p < 0.001$ vs. PBO<br>PBO −2.7%; $p = \text{NS}$ vs. BL                                                                                                                           | %CFB:<br>RZR −11.2%; $p < 0.001$ vs. PBO<br>PBO −1.0%; $p = \text{NS}$ vs. BL                                                                                                                               | %CFB:<br>RZR +0.7%; $p = \text{NS}$ vs. PBO<br>PBO +0.2%; $p = \text{NS}$ vs. BL                                                                                                          | %CFB:<br>RZR −5.0%; $p < 0.01$ vs. BL;<br>$p = \text{NS}$ vs. PBO<br>PBO −0.4%                                                                                                                  | NR                                                                    | NR                                                                    |
| Wang, 2019 [54]          | Median (mg/dL):<br>RZR MK BL 153, 3 m 122; $p < 0.05$ vs. BL, RZR GABA, and PBO<br>RZR GABA BL 151, 3 m 156; $p = 0.009$ vs. BL; $p = \text{NS}$ vs. PBO<br>PBO BL 154, 3 m 152; $p = \text{NS}$ vs. BL | Median (mg/dL):<br>RZR MK BL 237, 3 m 192.5; $p < 0.001$ vs. BL, $p < 0.05$ vs. RZR GABA and PBO<br>RZR GABA BL 235, 3 m 237; $p = \text{NS}$ vs. BL and PBO<br>PBO BL 230, 3 m 234; $p = \text{NS}$ vs. BL | Median (mg/dL):<br>RZR MK BL 51, 3 m 54; $p = \text{NS}$ vs. BL, RZR GABA, and PBO<br>RZR GABA BL 56, 3 m 52; $p = \text{NS}$ vs. BL and PBO<br>PBO BL 50, 3 m 49; $p = \text{NS}$ vs. BL | Median (mg/dL):<br>RZR MK BL 133, 3 m 113; $p = \text{NS}$ vs. BL, RZR GABA, and PBO<br>RZR GABA BL 112, 3 m 104; $p = \text{NS}$ vs. BL and PBO<br>PBO BL 148, 3 m 161; $p = \text{NS}$ vs. BL | NR                                                                    | NR                                                                    |
| Minamizuka, 2021 [55]    | Median CFB:<br>RZR −0.96; control −0.20<br>$p = 0.030$                                                                                                                                                  | Median CFB:<br>RZR −0.92; control 0.00<br>$p = 0.014$                                                                                                                                                       | Median CFB:<br>RZR −0.13; control 0.03<br>$p = 0.082$                                                                                                                                     | Median CFB:<br>RZR 0.24; control −0.05<br>$p = \text{NS}$                                                                                                                                       | NR                                                                    | Median CFB (g/L):<br>RZR −0.18; control 0.03<br>$p = 0.011$           |
| <b>Statin comparator</b> |                                                                                                                                                                                                         |                                                                                                                                                                                                             |                                                                                                                                                                                           |                                                                                                                                                                                                 |                                                                       |                                                                       |
| Xiaobin, 2007 [62]       | %CFB: XZK NA; ATV NA<br>$p < 0.01$ vs. BL for each; $p = \text{NS}$ vs. XZK vs. ATV                                                                                                                     | %CFB: XZK NA; ATV NA<br>$p < 0.05$ vs. BL for each; $p = \text{NS}$ vs. XZK vs. ATV                                                                                                                         | %CFB: XZK NA; ATV NA<br>$p < 0.05$ vs. BL for each; $p = \text{NS}$ vs. XZK vs. ATV                                                                                                       | %CFB: XZK NA; ATV NA<br>$p < 0.01$ vs. BL for each; $p = \text{NS}$ vs. XZK vs. ATV                                                                                                             | NR                                                                    | NR                                                                    |
| Gheith, 2008 [61]        | NR                                                                                                                                                                                                      | Mean (mg/dL)<br>XZK BL 457, 1 yr 303; FLV BL 436, 1 yr 302; PBO BL 463, 1 yr 348; $p = 0.003$ for FLV vs. PBO                                                                                               | NR                                                                                                                                                                                        | NR                                                                                                                                                                                              | NR                                                                    | NR                                                                    |

|                    |                                                                                                                                      |                                                                                                                                    |                                                                                                                                                              |                                                                                                                                  |    |    |
|--------------------|--------------------------------------------------------------------------------------------------------------------------------------|------------------------------------------------------------------------------------------------------------------------------------|--------------------------------------------------------------------------------------------------------------------------------------------------------------|----------------------------------------------------------------------------------------------------------------------------------|----|----|
| Liu, 2011 [66]     | %CFB: significantly lowered for all groups; intergroup comparisons (XZK, LRRMP, LOV) $p = NS$                                        | %CFB: significantly lowered for all groups; intergroup comparisons (XZK, LRRMP, LOV) $p = NS$                                      | %CFB: not significantly lowered for all groups                                                                                                               | %CFB: significantly lowered for all groups; intergroup comparisons (XZK, LRRMP, LOV) $p = NS$                                    | NR | NR |
| Li, 2011 [65]      | Reduced vs. control in both groups $p = 0.05$                                                                                        | Reduced vs. control in both groups $p = 0.05$                                                                                      | NR                                                                                                                                                           | Reduced vs. control in both groups $p = 0.05$                                                                                    | NR | NR |
| Halbert, 2010 [63] | %CFB: RYR −30.2%; PRV −27.0%<br><br>ΔLDL-C (CFB RYR vs. PRV): −10.7 mg/dL; $p = NS$                                                  | %CFB: RYR −23.0%; PRV −19.6%<br><br>ΔTC (CFB RYR vs. PRV): −9.6 mg/dL; $p = NS$                                                    | %CFB: RYR −3.8%; PRV +0.2%<br><br>ΔHDL-C (CFB RYR vs. PRV): −2.5 mg/dL; $p = NS$                                                                             | %CFB: RYR −7.8%; PRV −7.0%<br><br>ΔTG (CFB RYR vs. PRV): 0.5 mg/dL; $p = NS$                                                     | NR | NR |
| Ruscica, 2014 [59] | Armolidip Plus® BL 3.91, Wk 8 3.09<br>PRV BL 3.97, Wk 8 3.07<br>$p < 0.0001$ for both vs. BL<br><br>$p = NS$ Armolidip Plus® vs. PRV | Armolidip Plus® BL 6.2, Wk 8 5.4<br>PRV BL 6.41, Wk 8 5.38<br>$p < 0.0001$ for both vs. BL<br><br>$p = NS$ Armolidip Plus® vs. PRV | Armolidip Plus® BL 1.04, Wk 8 1.09<br>PRV BL 1.10, Wk 8 1.11<br>$p = NS$ PRV vs. BL<br>$p < 0.05$ Armolidip Plus® vs. BL<br>$p = NS$ Armolidip Plus® vs. PRV | Armolidip Plus® BL 2.44, Wk 8 2.21<br>PRV BL 2.55, Wk 8 2.43<br>$p = NS$ for both vs. BL<br><br>$p = NS$ Armolidip Plus® vs. PRV | NR | NR |
| Marazzi, 2017 [60] | %CFB: RYR + LDS −26.8%; LDS −4.3%<br>$p < 0.0001$ for Armolidip Plus® + LDS vs. LDS                                                  | %CFB: RYR + LDS −17.5%; LDS −3.5%<br>$p < 0.0001$ for Armolidip Plus® + LDS vs. LDS                                                | %CFB: RYR + LDS +8.8%; LDS +3.7%<br>$p = 0.02$ for Armolidip Plus® + LDS vs. LDS                                                                             | %CFB: RYR + LDS −10.2%; LDS −7.9%<br>$p = NS$ for Armolidip Plus® + LDS vs. LDS                                                  | NR | NR |
| Kou, 1997 [56]     | %CFB: XZK −28.0%; SMV −29.5%<br>$p = NS$ XZK vs. SMV                                                                                 | %CFB: XZK −23.0%; SMV −23.3%<br>$p = NS$ XZK vs. SMV                                                                               | %CFB: XZK +5.0%; SMV +14.3%<br>$p = NS$ XZK vs. SMV                                                                                                          | %CFB: XZK −28.1%; SMV −29.5%<br>$p = NS$ XZK vs. SMV                                                                             | NR | NR |

|                 |                                                                                                      |                                                                                                   |                                                                                                               |                                                                                                           |    |    |
|-----------------|------------------------------------------------------------------------------------------------------|---------------------------------------------------------------------------------------------------|---------------------------------------------------------------------------------------------------------------|-----------------------------------------------------------------------------------------------------------|----|----|
| Chen, 2002 [57] | %CFB: XZK −28.2%; SMV −22.7%<br>$p = \text{NS}$ XZK vs. SMV                                          | %CFB: XZK −21.8%; SMV −21.3%<br>$p = \text{NS}$ XZK vs. SMV                                       | %CFB: XZK +6.2%; SMV +5.7%<br>$p = \text{NS}$ XZK vs. SMV                                                     | %CFB: XZK −18.1%; SMV −1.6%<br>$p < 0.001$ XZK vs. SMV                                                    | NR | NR |
| Xue, 2017 [64]  | %CFB: RYR −33.4%; SMV −30.9%<br>$p < 0.001$ for both vs. BL<br>$p = \text{NS}$ RYR vs. SMV           | %CFB: RYR −18.5%; SMV −19.6%<br>$p < 0.001$ for both vs. BL<br>$p = \text{NS}$ RYR vs. SMV        | %CFB:<br>$p = \text{NS}$ for both vs. BL                                                                      | %CFB:<br>$p = \text{NS}$ for both vs. BL                                                                  | NR | NR |
| Cui, 2015 [58]  | LDL-C (mg/dL):<br>XZK BL 152, Wk 8 119; $p < 0.05$ vs. BL<br>SMV BL 151, Wk 8 118; $p < 0.05$ vs. BL | TC (mg/dL):<br>XZK BL 200, Wk 8 170; $p < 0.05$ vs. BL<br>SMV BL 201, Wk 8 156; $p < 0.05$ vs. BL | HDL-C (mg/dL):<br>XZK BL 41, Wk 8 49; $p < 0.05$ vs. BL and SMV<br>SMV BL 42, Wk 8 44; $p = \text{NS}$ vs. BL | TG (mg/dL):<br>XZK BL 189, Wk 8 146; $p < 0.05$ vs. BL and SMV<br>SMV BL 191, Wk 8 168; $p < 0.05$ vs. BL | NR | NR |

Apo = apolipoprotein; ATV = atorvastatin; BL = baseline; CFB = change from baseline; FLV = fluvastatin; GABA = gamma-aminobutyric acid; HDL-C = high-density lipoprotein cholesterol; HDS = high-dose statin; LDL-C = low-density lipoprotein cholesterol; LDS = low-dose statin (ATV 5–10 mg/d, RSV 5 mg/d, or SMV 10–20 mg/d); LOV = lovastatin; LRRMP = lipid-reducing red rice minute powder; LS = least squares; MK = monacolin K; NA = not available; NR = not reported; NS = not significant; PBO = placebo; PRV = pravastatin; QD = once daily; RYR = red yeast rice; SMV = simvastatin; TC = total cholesterol; TG = triglycerides; Wk = week; XZK = Xuezhikang.

Supplemental Table S3. Summary of RYR safety reported by meta-analyses.

| Authors                          | Study Dates          | Number of Studies | RYR Dosage <sup>a</sup>             | Comparators                                                                     | Principal AE Findings                                                                                                                                                                                                                                                          |
|----------------------------------|----------------------|-------------------|-------------------------------------|---------------------------------------------------------------------------------|--------------------------------------------------------------------------------------------------------------------------------------------------------------------------------------------------------------------------------------------------------------------------------|
| Gerards et al. [10]              | Up to November 2014  | 20                | RYR 1200–4800 mg/d (MK 4.8–24 mg/d) | Inactive control (13); statin (3); non-statin active control (4)                | Incidence of liver abnormalities and kidney injury: 0–5%: did not differ between RYR and control<br>Incidence of muscle symptoms: 0–23.8% with RYR, 0–36% with controls<br>Rhabdomyolysis: not observed                                                                        |
| Li et al. [11]                   | Up to September 2021 | 15                | RYR or XZK 200–2400 mg/d            | Placebo (9); statins (3); phytosterols (1); nattokinase (1); nutraceuticals (1) | Incidence of AEs with RYR was similar to control (RYR alone: RR 1.18; 95% CI 0.91 to 1.54; $p = 0.21$ . RYR combination: RR 1.63; 95% CI 0.22 to 11.83; $p = 0.63$ )                                                                                                           |
| Fogacci et al. [86] <sup>b</sup> | Up to 2019           | 53                | RYR 100–4800 mg/d                   | Placebo (47); statins (6); non-statin active control (2)                        | RYR was not associated with musculoskeletal disorders (OR=0.94, 95% CI 0.53 to 1.65)<br>Risk of non-musculoskeletal disorders reduced (OR=0.59, 95% CI 0.50 to 0.69)<br>Risk of serious AEs reduced (OR=0.54, 95% CI 0.46 to 0.64)<br>Results were consistent across subgroups |
| Shang et al. [95]                | Up to September 2011 | 22 <sup>c</sup>   | XZK 600–1800 mg/d                   | Conventional therapy (11); statin + conventional therapy (6); statin (4)        | Most commonly reported AEs: intestinal disturbances, dizziness, high serum alanine aminotransferase, high serum creatine kinase, high serum creatinine, high blood urea nitrogen, and skin itch<br>AEs were not significantly different between XZK and control                |
| Cicero et al. [76]               | Up to February 2021  | 12                | Armolidip Plus <sup>®</sup>         | Placebo (11); low-dose statin (1)                                               | Armolidip Plus <sup>®</sup> produced a slight but clinically insignificant increase in serum ALT without affecting AST or CPK<br>Armolidip Plus <sup>®</sup> was not associated with increased risks of musculoskeletal disorders or gastrointestinal disorders                |

<sup>a</sup>Some studies included combinations of RYR with nutraceuticals or a statin; <sup>b</sup>Two studies had placebo and a statin as control; <sup>c</sup>Studies in patients with coronary heart disease.

AE = adverse event; ALT = alanine aminotransferase; AST = aspartate aminotransferase; CI = confidence interval; CPK = creatine phosphokinase; OR = odds ratio; RR = relative risk; RYR = red yeast rice; XZK = Xuezhikang.

**Supplemental Table S4.** Summary of RYR adverse drug reaction reports collected by surveillance systems.

| Surveillance System                                                 | Collection Period | Total Number of Case Reports, <i>n</i> | Total Number of ADRs, <i>n</i> | Causality of ADRs, <i>n</i>                                     | Most Frequently Reported Adverse Drug Reactions by SOC, <i>n</i> (%) |                   |                |                       |         |                |
|---------------------------------------------------------------------|-------------------|----------------------------------------|--------------------------------|-----------------------------------------------------------------|----------------------------------------------------------------------|-------------------|----------------|-----------------------|---------|----------------|
|                                                                     |                   |                                        |                                |                                                                 | Musculo-skeletal                                                     | Gastro-intestinal | Hepato-biliary | Skin and Subcutaneous | General | Nervous System |
| Italian Surveillance System of Natural Health Products [96]         | 2002–2015         | 52                                     | 55                             | Certain 1; probable 31; possible 18; unlikely 3; unassessable 2 | 20 (36)                                                              | 12 (22)           | 10 (18)        | 9 (16)                | –       | 2 (4)          |
| Netherlands Pharmacovigilance Centre Lareb [97]                     | 2007–2020         | 94                                     | 187                            | Certain 2; probable/likely 24; possible 61; unlikely 7          | 64 (34)                                                              | 33 (18)           | 3 (2)          | 6 (3)                 | 23 (12) | 16 (9)         |
| Post-marketing product-based (Armolid®/Armolid Plus®) database [75] | 2004–2019         | 542                                    | 855                            | –                                                               | 148 (17)                                                             | 293 (34)          | 26 (3)         | –                     | –       | –              |

ADRs = adverse drug reactions; RYR = red yeast rice; SOC = system organ class.
